# Supplementary material for: Spatiotemporal Patterns and Trends of Precipitation and Their Correlations with Related Meteorological Factors by Two Sets of Reanalysis Data in China
Source: Copernicus journal article supplement (doi:10.5194/hess-2017-756), 2018-01-17
Supplement: Supplementary file [file Figures Final.pdf › reply to editor/Figures Final.pdf]

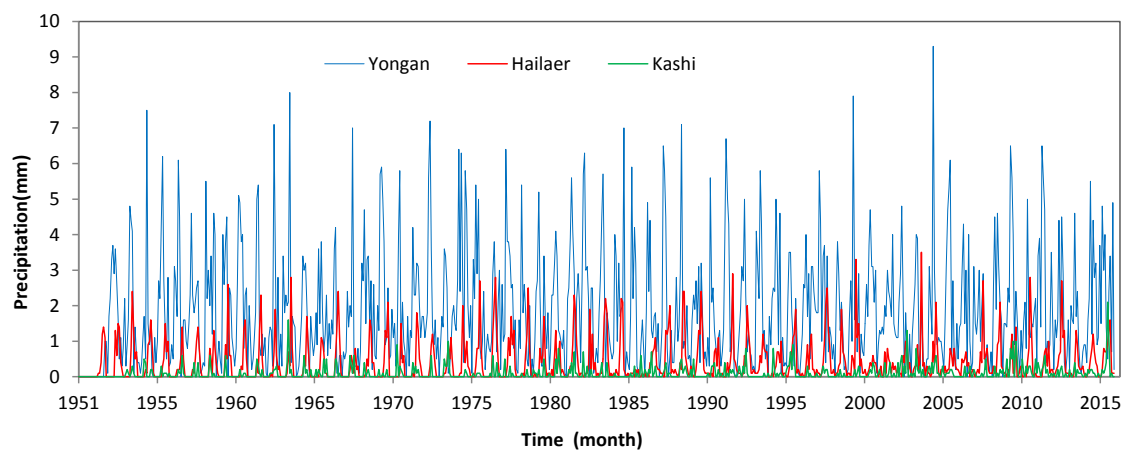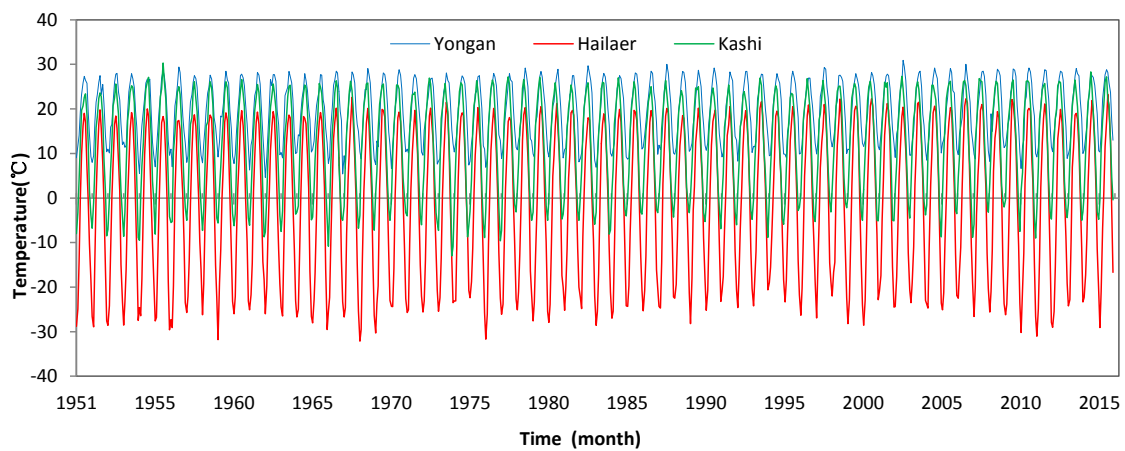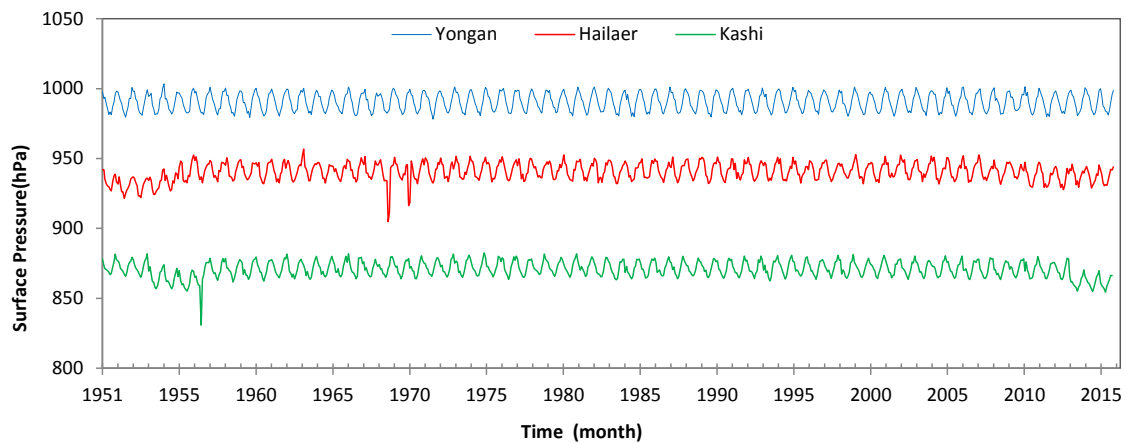

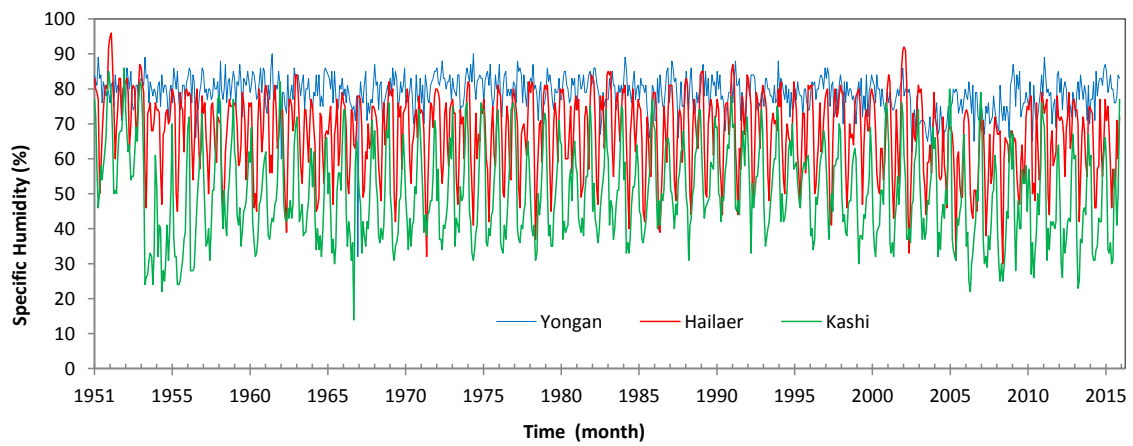

Figure 1 Monthly measured meteorological datasets from 3 different stations

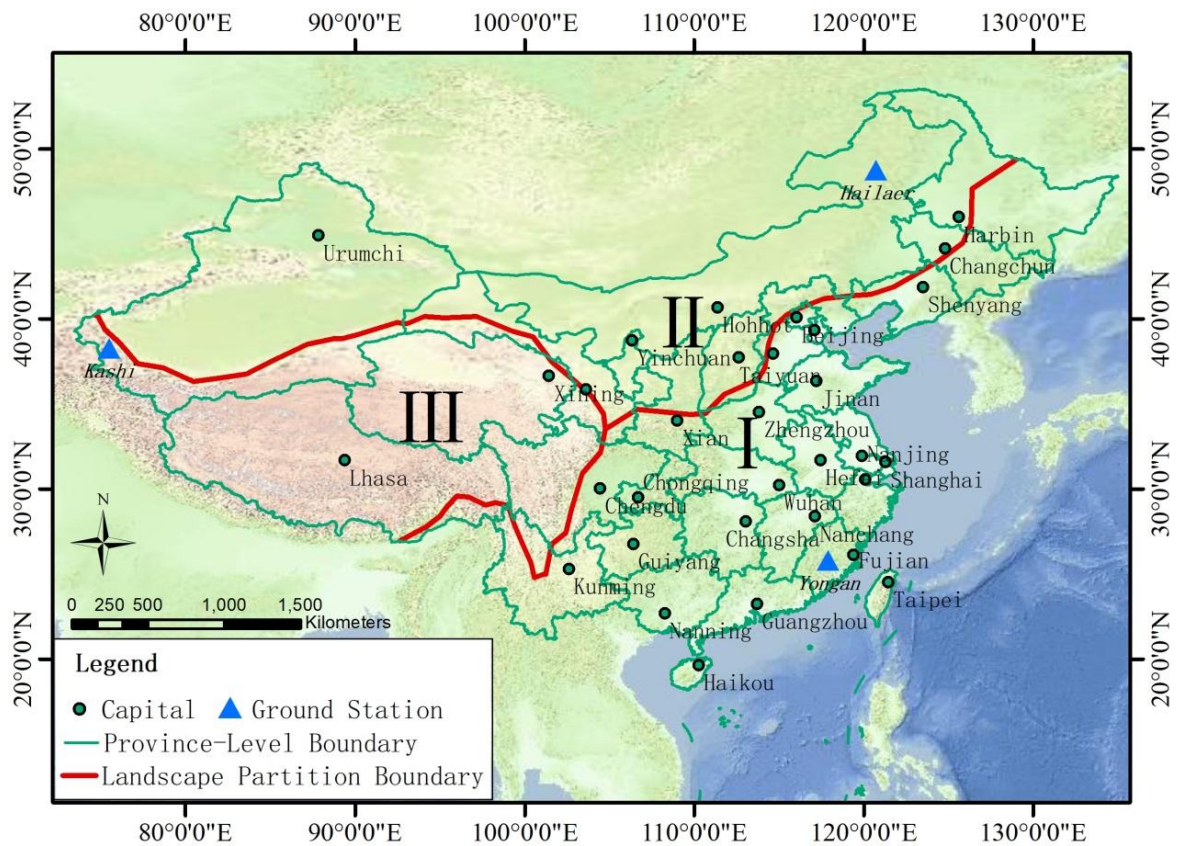

Figure 2 China Landscape Map with Storm Zoning

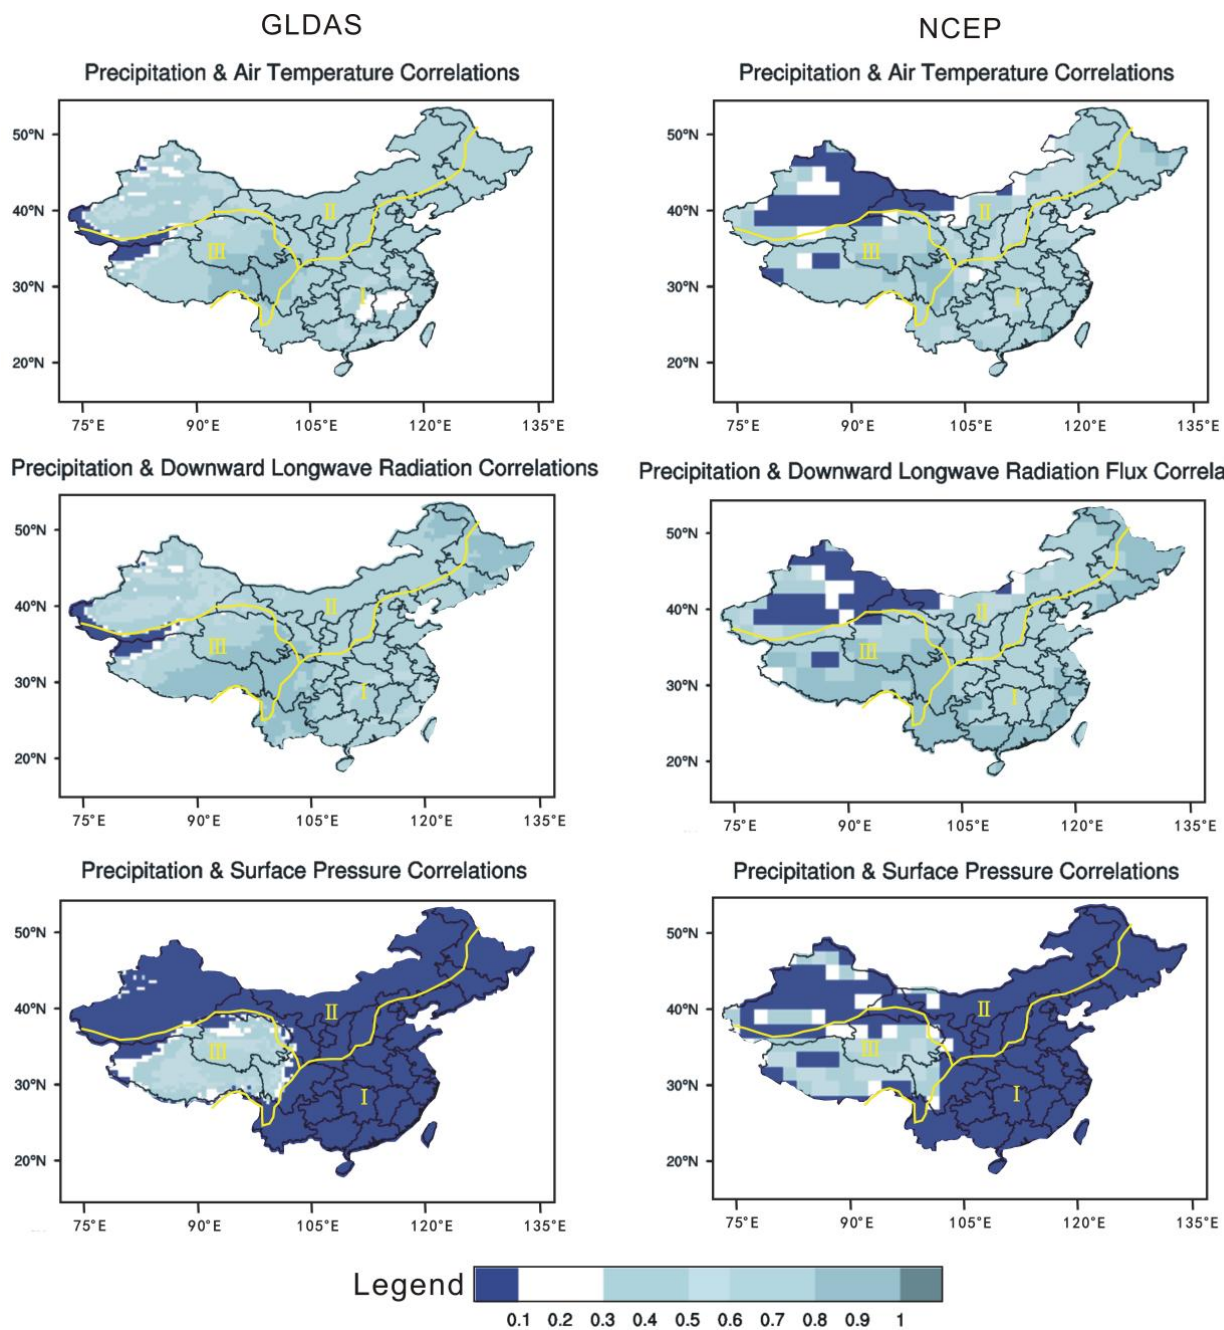

Figure 3 Correlation of precipitation and other meteorological factors (temperature/longwave/pressure) by GLDAS and NCEP ( $r=0.086$  at a 99% confidence level)

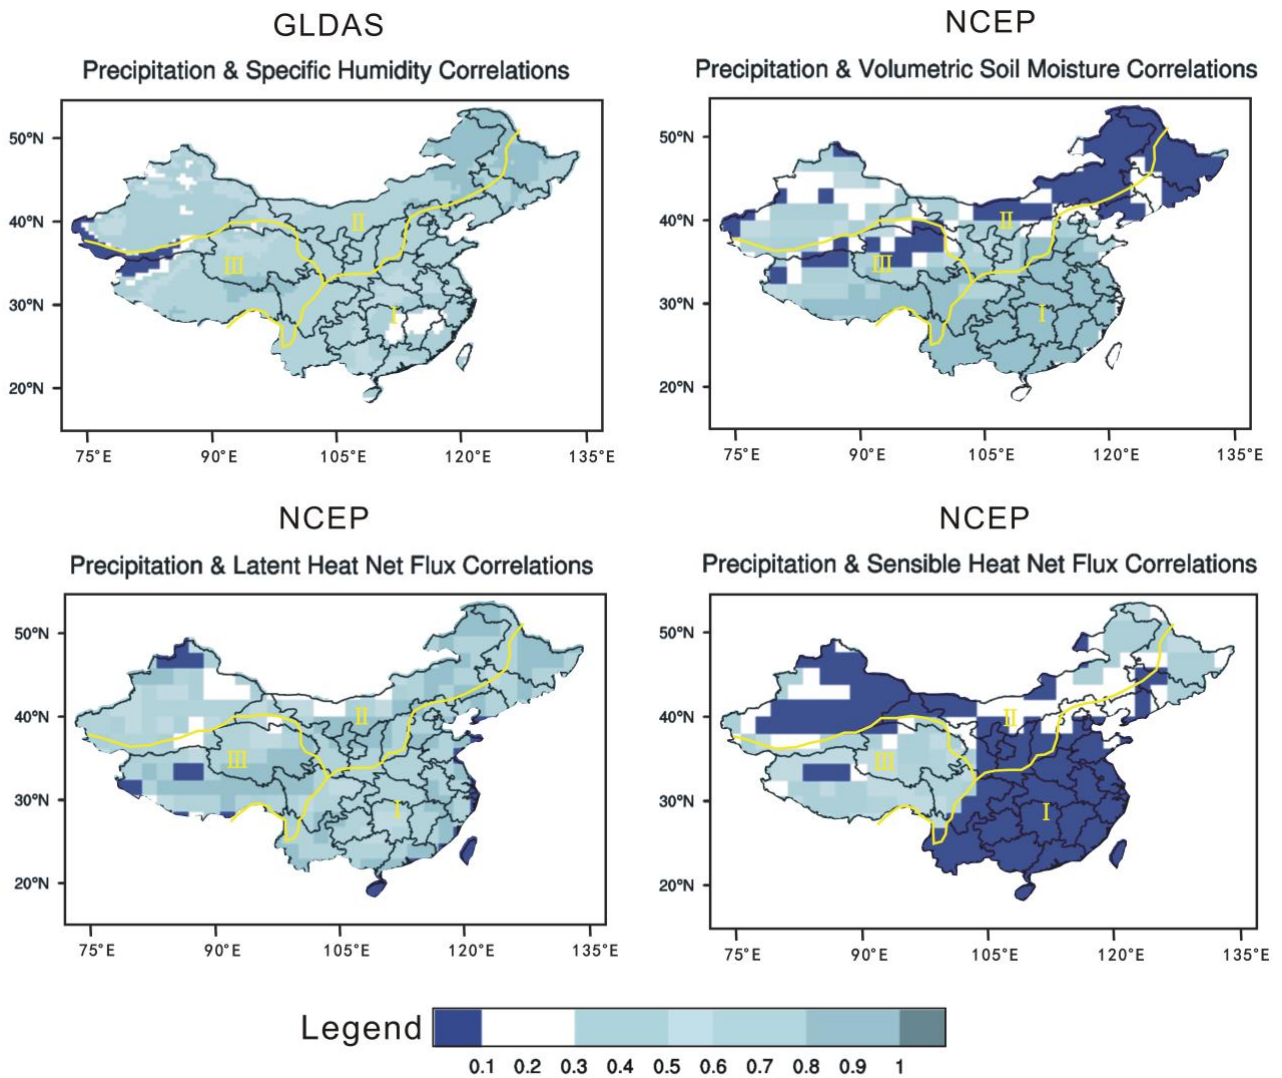

Figure 4 Correlation of precipitation and other meteorological factors (humidity/soil moisture/latent heat/sensible heat) by GLDAS and NCEP ( $r=0.086$  at a 99% confidence level)



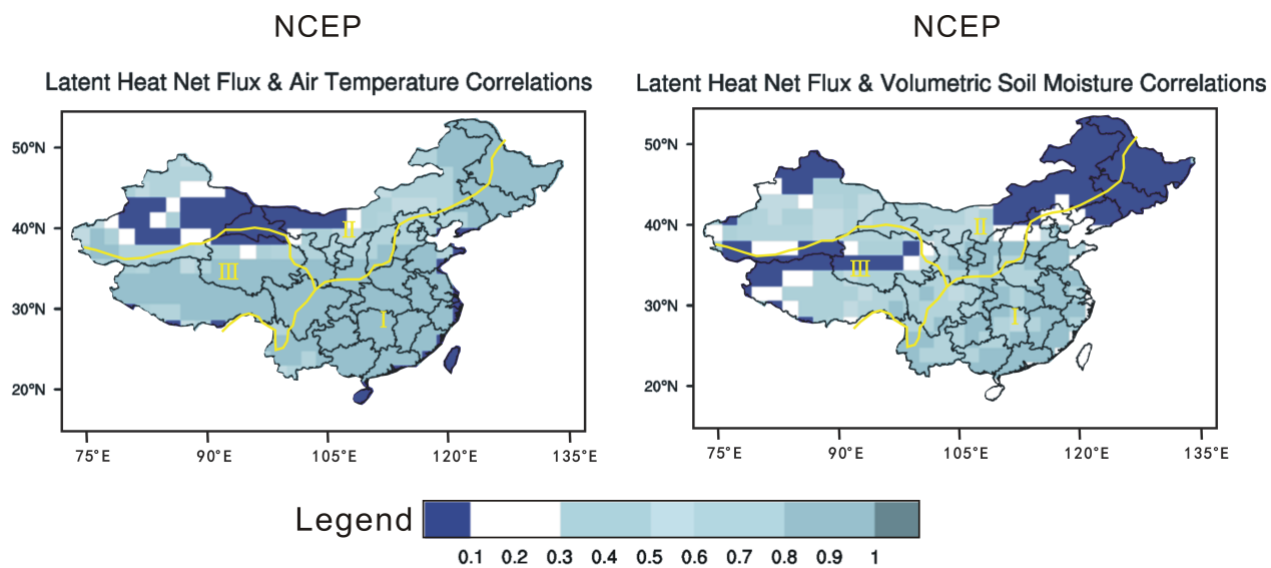

Figure 5 Correlation of latent heat and other meteorological factors (temperature/soil moisture) by NCEP ( $r=0.086$  at 99% confidence level)

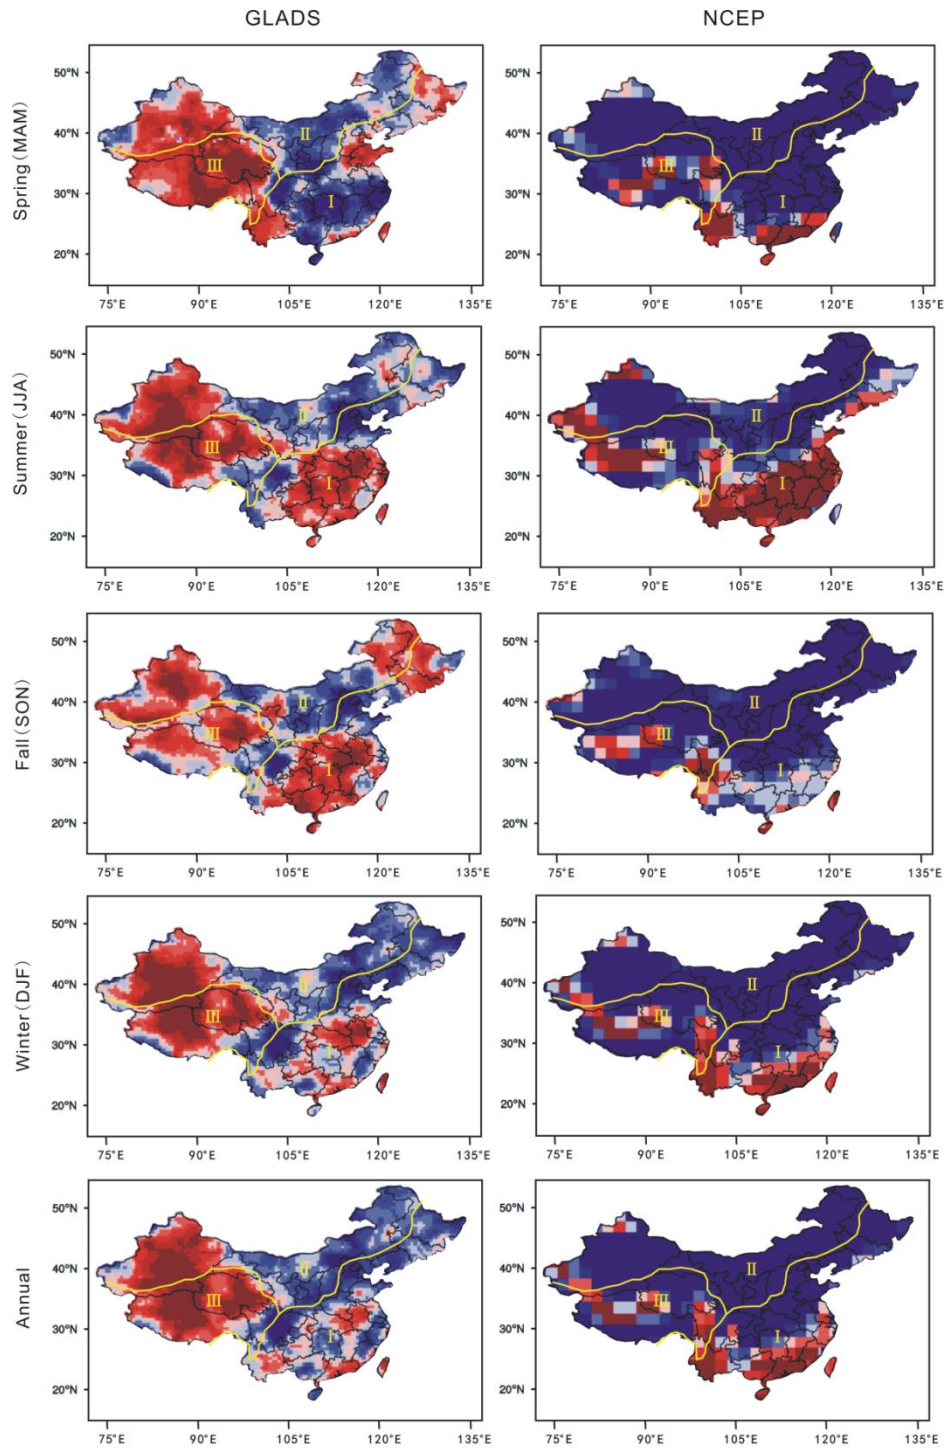

Figure 6 Mann-Kendall test Z values by GLDAS and NCEP for precipitation ( $Z=1.96$  at 95% confidence level)

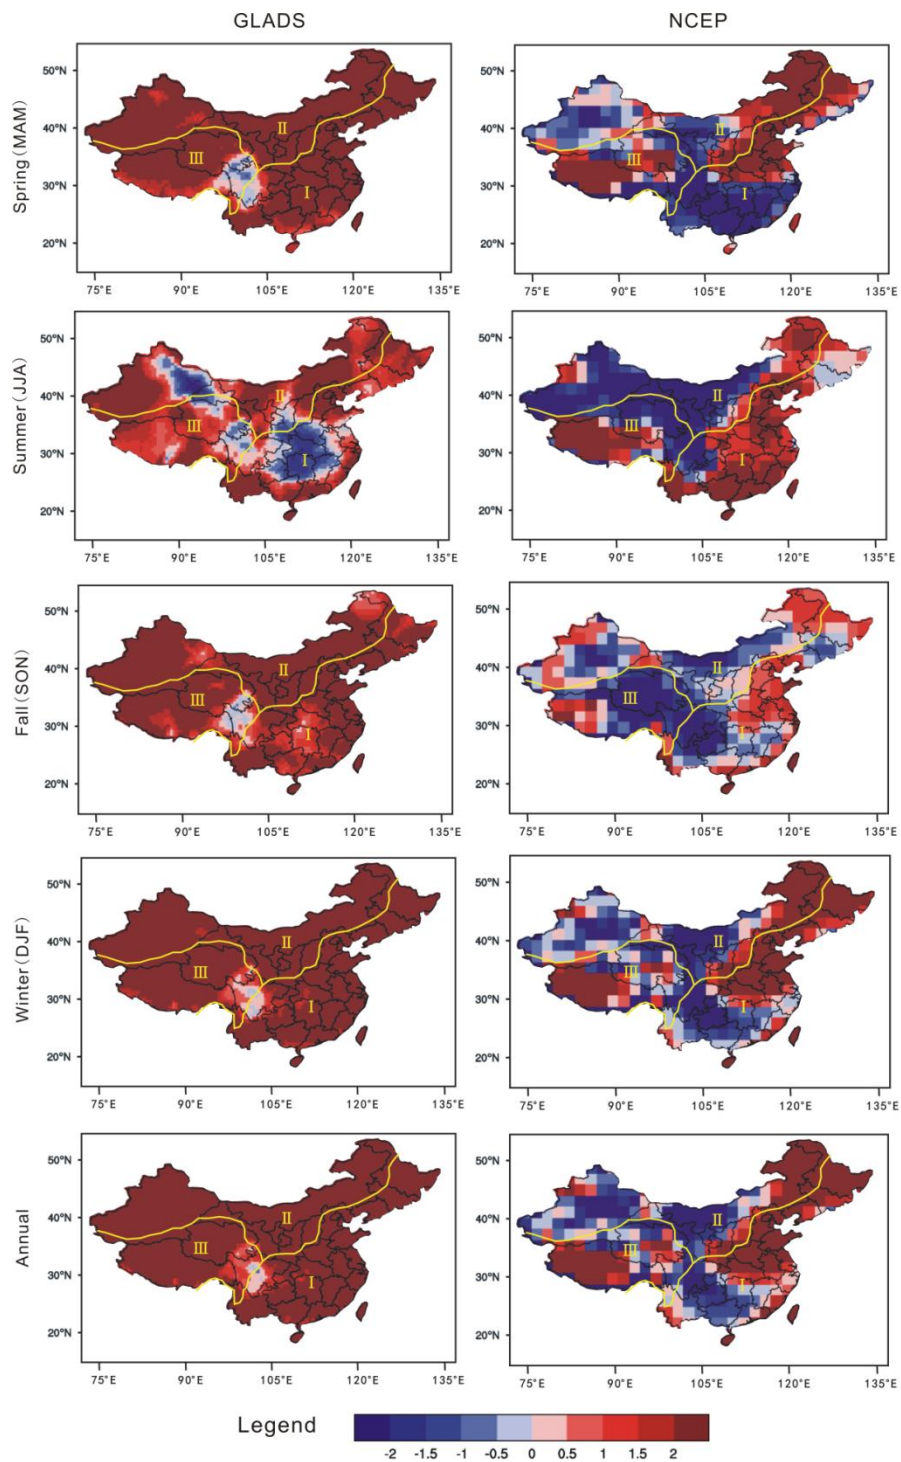

Figure 7 Mann-Kendall test Z values by GLDAS and NCEP for surface temperature ( $Z=1.96$  at 95% confidence level)

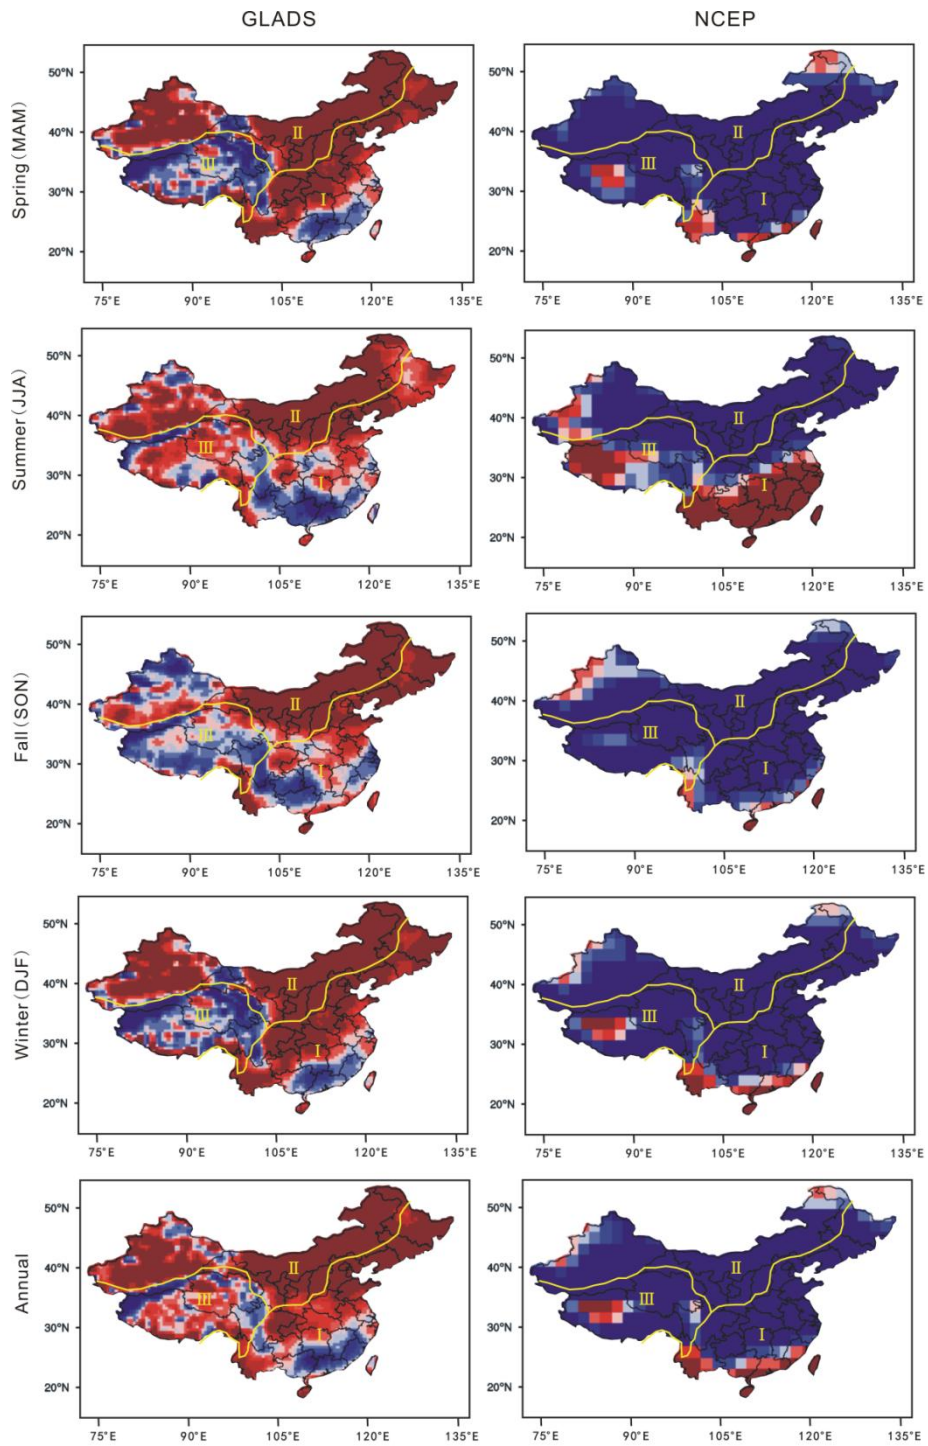

Figure 8 Mann-Kendall test Z values by GLDAS and NCEP for downward longwave radiation ( $Z=1.96$  at 95% confidence level)



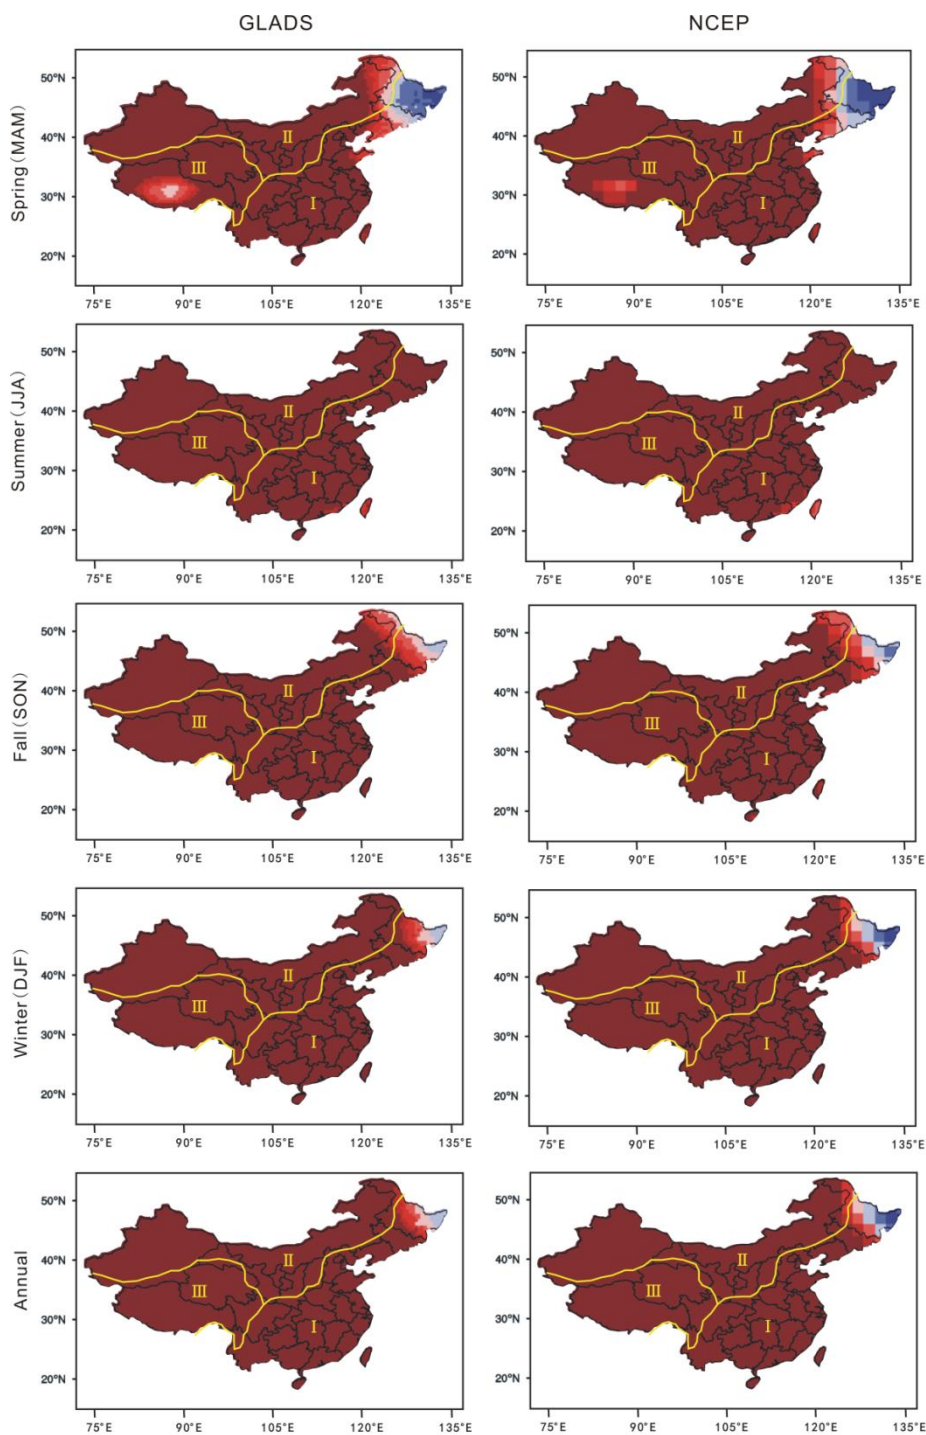

Figure 9 Mann-Kendall test Z values by GLDAS and NCEP for surface pressure ( $Z=1.96$  at 95% confidence level)

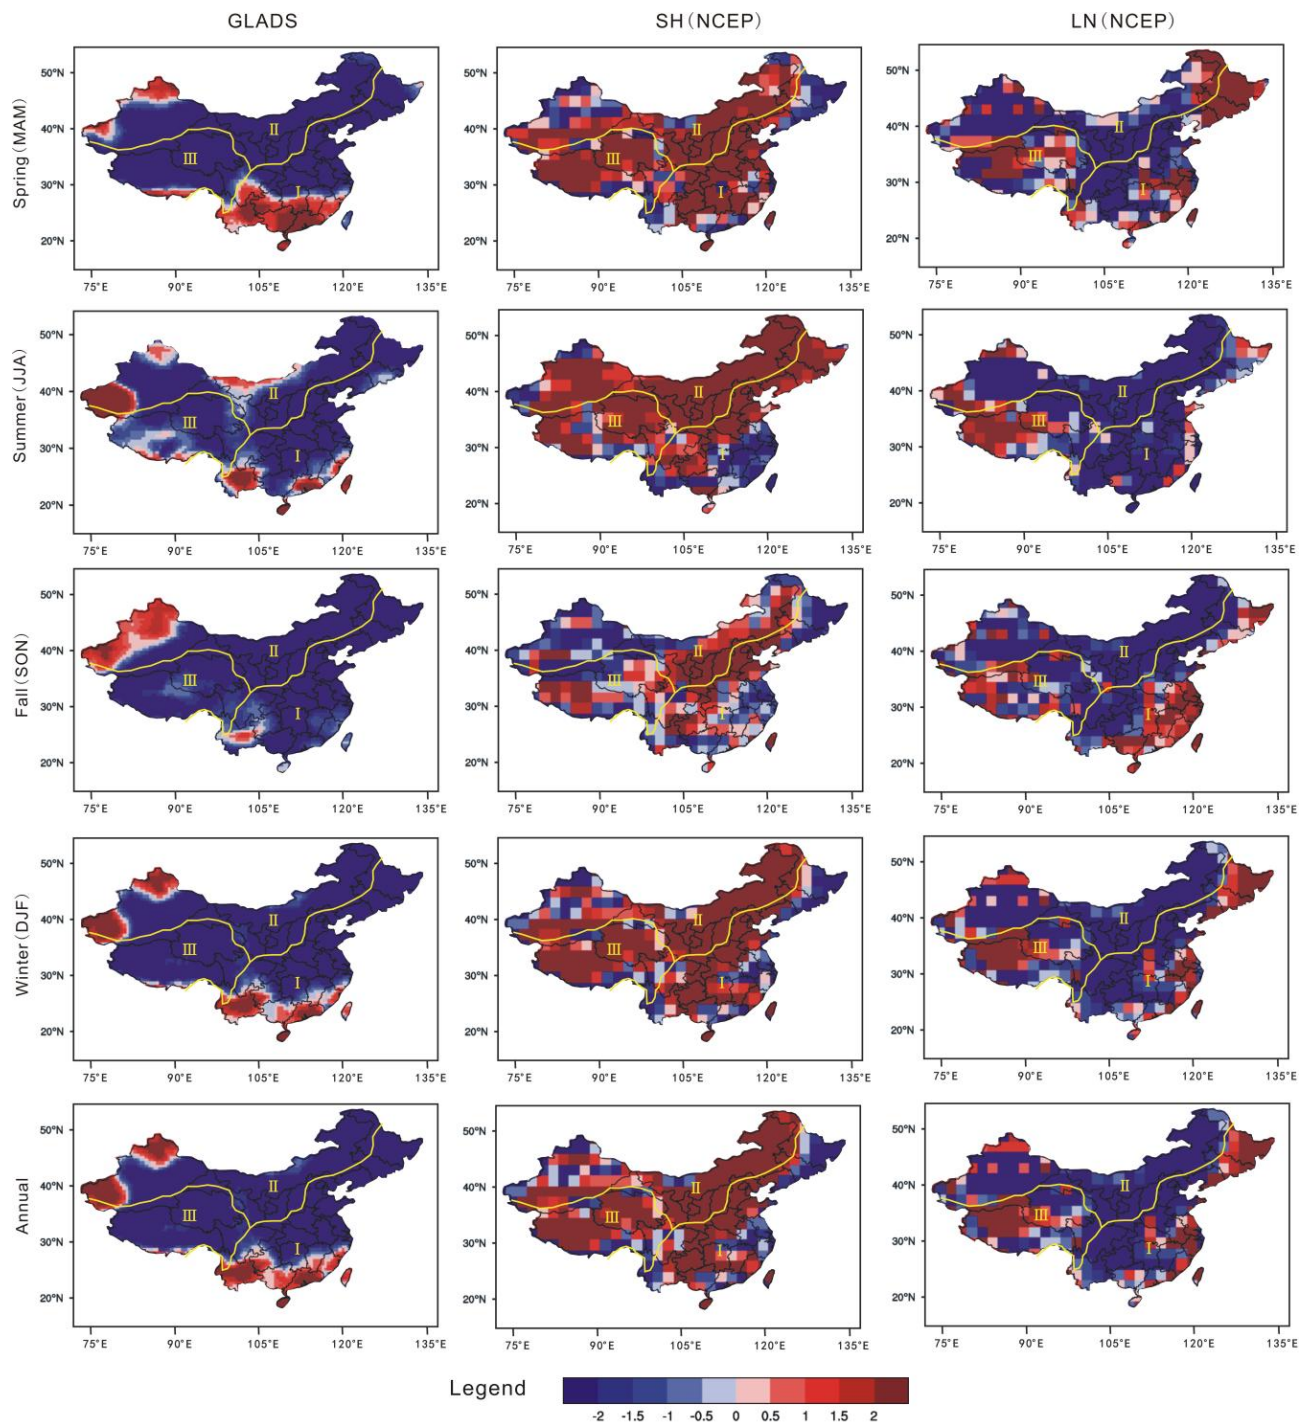

Figure 10 Mann-Kendall test Z values for humidity by GLDAS and for sensible/latent heat by NCEP (Z=1.96 at 95% confidence level)

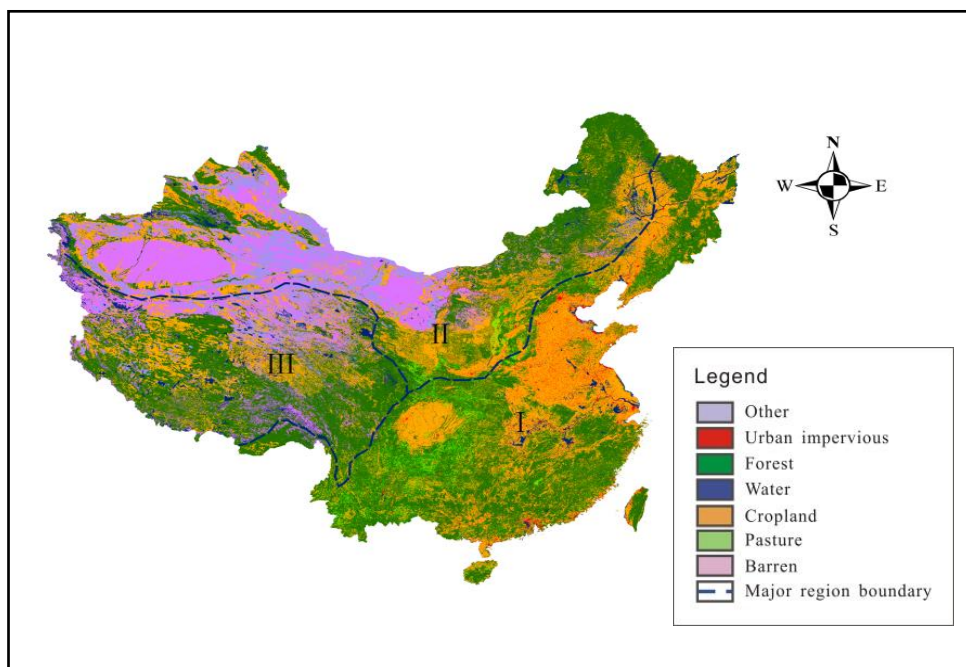

Figure 1 Land Use Map
