# Supplementary material for: Spatiotemporal Patterns and Trends of Precipitation and Their Correlations with Related Meteorological Factors by Two Sets of Reanalysis Data in China
Source: Copernicus journal article supplement (doi:10.5194/hess-2017-756), 2018-01-17
Supplement: Supplementary file [file Tables.pdf › reply to editor/Tables.pdf]

Table 1 the Information of Meteorological Stations

| Zone NO. | ID.   | Station Name | Latitude(N) | Longitude(E) |
|----------|-------|--------------|-------------|--------------|
| I        | 58921 | Yongan       | 25.58 °     | 117.21 °     |
| II       | 50527 | Hailaer      | 49.13 °     | 119.45 °     |
| III      | 51709 | Kashi        | 39.28 °     | 75.52 °      |

Table 2 Correlation of precipitation and other measured meteorological factors

| Zone NO. | ID.   | Station Name | Correlation                     |                                  |                                   |
|----------|-------|--------------|---------------------------------|----------------------------------|-----------------------------------|
|          |       |              | Precipitation & Air temperature | Precipitation & Surface pressure | Precipitation & Specific humidity |
| I        | 58921 | Yongan       | 0.641                           | 0.103                            | 0.703                             |
| II       | 50527 | Hailaer      | 0.594                           | 0.094                            | 0.671                             |
| III      | 51709 | Kashi        | 0.311                           | 0.281                            | 0.344                             |

Table 3 Mann-Kendall test Z values for threemeasured meteorological factors

| Zone NO. | ID.   | Station Name | Value of Z      |                  |                   |
|----------|-------|--------------|-----------------|------------------|-------------------|
|          |       |              | Air temperature | Surface pressure | Specific humidity |
| I        | 58921 | Yongan       | 2.21            | -0.21            | -1.47             |
| II       | 50527 | Hailaer      | 1.82            | 1.94             | 1.52              |
| III      | 51709 | Kashi        | 2.07            | 2.01             | 1.64              |
